# Supplementary material for: Evidence of anion-induced dimerization of a squaramide-based host in protic solvents
Source: Royal Society of Chemistry journal article supplement (doi:10.1039/b614172b), 2006-12-15
Supplement: b614172b.pdf [file b614172b.pdf]

## Supporting Information

### Evidence of anion induced dimerization of an squaramide-based host in protic solvents

M. Neus Piña, Carmen Rotger,\* Bartomeu Soberats, Pablo Ballester, Pere M. Deyà and Antoni Costa\*

#### Instruments and synthetic procedures

**General:** All commercially available reagents were used without further purification unless otherwise stated. Diethyl ether and ethanol used for synthesis were distilled from calcium hydride immediately before use. MeOH-*d*<sub>4</sub>, DMSO-*d*<sub>6</sub> were used from freshly opened ampoules, and CDCl<sub>3</sub>(99.8% D) was stored on molecular sieves (3 Å). (TMA)<sub>2</sub>SO<sub>4</sub> (Aldrich) was dried in a drying pistol (< 0.1 mm Hg; refluxing toluene) for 12 h over sodium pentoxide before use. <sup>1</sup>H and <sup>13</sup>C NMR spectra were recorded on a Bruker Avance at 300 and 75 MHz at 23 °C. Chemical shifts are reported as parts per million (δ) referenced to the residual hydrogen signal of deuterated solvents. Electrospray mass spectra (ESMS) were recorded with a Micromass, Autospec3000 spectrometer provided with an electrospray module. The ITC experiments were carried out on a Microcal, ultramicrocalorimeter MCS-ITC. The ITC instrument was periodically calibrated using an internal electric heater, following the procedures recommended by the manufacturer. The UV-Vis absorption spectra were registered with Varian Cary50-Bio and the fluorescence titrations with an Aminco-Bowman series2 spectrophotometers.

#### Synthesis of host 1

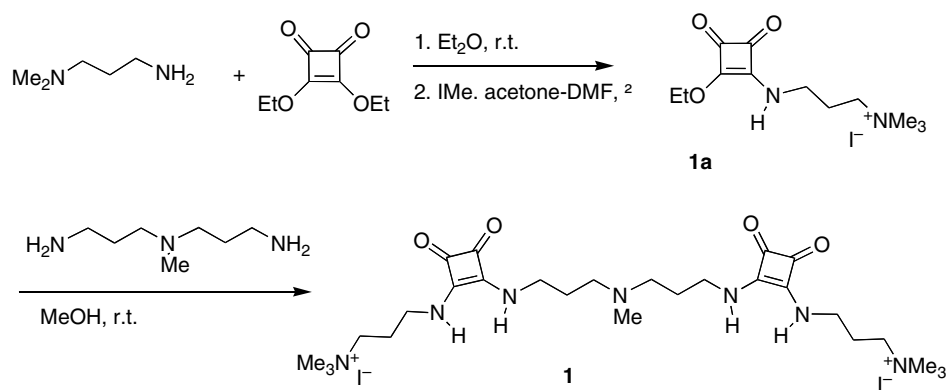

Scheme S1

### Preparation of 3-(trimethylammoniumpropylamino)-4-ethoxycyclobut-3-ene-1,2-dione

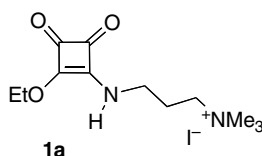

A solution of *N,N*-dimethylpropylendiamine (1g, 9.8 mmol) in diethyl ether (10 mL) was added dropwise over 1 h to a stirred solution of diethyl squarate (2g, 11.8 mmol) in diethyl ether (10 mL). The mixture was stirred overnight at room temperature in an atmosphere of argon. After cooling at 0°C, the mixture was diluted with *n*-pentane (20 mL). The resulting white solid was isolated by centrifugation after decanting the supernatant and purified by washing with *n*-pentane-diethyl ether (9:1 v/v, 10 mL x 3), to give the monosquaramide ester<sup>1</sup> (2.2 g, 98 %)  $\delta_{\text{H}}$  (300 Mhz; DMSO- $d_6$ ) 8.98 (br s,  $0.6 \times \text{NH}_{\text{syn}}$ ), 8.65 (br s,  $0.4 \times \text{NH}_{\text{anti}}$ ), 4.74 (br q,  $J = 7.0$  Hz, 2H), 3.60 (br m,  $0.4 \times 2\text{H}_{\text{syn}}$ ), 3.41 (br m,  $0.6 \times 2\text{H}_{\text{anti}}$ ), 2.33 (t,  $J = 6.9$  Hz, 2H), 2.21 (s, 6H), 1.73 (quintet,  $J = 7.0$  Hz, 2H) and 1.46 (t,  $J = 7.0$  Hz, 3H);  $\delta_{\text{C}}$  (75 Mhz; DMSO- $d_6$ ) 189.3, 182.2, 176.5, 172.5, 68.7, 55.9, 44.9, 40.3, 28.2, 27.8 and 15.7;  $m/z$  HRMS-ES (+) 249.1216 ( $\text{M} + \text{Na}^+$ ,  $\text{C}_{11}\text{H}_{18}\text{N}_2\text{O}_3\text{Na}$  requires 249.1215).

Methyl iodide (0.91 mL, 14.6 mmol) was added via syringe over 30 min to a stirred solution of the monosquaramide ester (2.17 g, 9.6 mmol) in acetone (60 mL). The mixture was heated under reflux in an atmosphere of argon for 12 h, after which it was cooled at room temperature and diluted with *n*-pentane (20 mL). The tetramethylammonium salt was obtained as a yellow solid that precipitates upon cooling at 0°C. The solvent was removed with a Pasteur pipette, and the solid was purified by washing with cold acetone-*n*-pentane (8:2 v/v, 20 mL x 3). The yellow product was dried in vacuo to give the tetramethylammonium salt **1a** (3.53 g, 90 %).  $\nu_{\text{max}}$  (KBr)/ $\text{cm}^{-1}$ : 3515, 3191, 1796, and 1695;  $\delta_{\text{H}}$  (300 Mhz; DMSO- $d_6$ ) 8.89 (br s,  $0.55 \times \text{NH}_{\text{syn}}$ ), 8.72 (br s,  $0.45 \times \text{NH}_{\text{anti}}$ ), 4.76 (br q,  $J = 6.9$  Hz, 2H), 3.64 (m,  $0.4 \times 2\text{H}_{\text{syn}}$ ), 3.42 (m,  $0.6 \times 2\text{H}_{\text{anti}}$ ), 3.15 (s, 9H), 2.05 (m, 2H), 1.47 (t,  $J = 6.9$  Hz, 3H);  $\delta_{\text{C}}$  (75 Mhz; DMSO- $d_6$ ) 189.3, 182.4, 177.2, 172.7, 68.9, 62.7, 52.2; 40.8, 23.6 and 15.7;  $m/z$  HRMS-ES (+) 241.1552 ( $\text{M}^+ - \text{I}^-$ ,  $\text{C}_{12}\text{H}_{21}\text{N}_2\text{O}_3$  requires 241.1558).

### Preparation of *N,N*-bis-[3-[2-(trimethylammoniumpropylamino)-3,4-dioxo-1-cyclobutenyl]aminopropyl]methylamine diiodide (**1**)

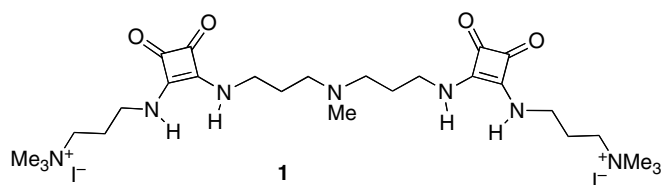

A solution of *N,N*-bis(3-aminopropyl)methylamine (248  $\mu\text{L}$ , 1.5 mmol) in methanol (25 mL) was added dropwise over 1 h to a stirred solution of the monosquaramide-ammonium salt **1a** (1 g, 2.72 mmol) in methanol (5 mL). The mixture was stirred overnight at room temperature in an atmosphere of argon. After this period, a yellow solid had formed in the bottom of the flask. The reaction was diluted with pentane (20  $\text{cm}^3$ ), cooled to 0°C and centrifuged. The resultant yellow solid was washed with *n*-pentane-methanol (9:1 v/v, 10 mL x 3) and dried under high vacuum to give **1** as the diiodide salt (903 mg, 77%).  $\nu_{\text{max}}$  (KBr)/ $\text{cm}^{-1}$ : 3453, 1802, 1661, 1597 and 1543;  $\delta_{\text{H}}$  (300 Mhz; DMSO- $d_6$ ) 7.51 (br s, NH), 3.65 (br t, 8H, NH- $\text{CH}_2$ ), 3.43 (m, 4H,  $\text{Me}_3\text{N}^+-\text{CH}_2$ ), 3.18 (s, 18H,  $\text{Me}_3\text{N}^+$ ), 2.43 (br t,  $J = 6.6$  Hz, 4H, N- $\text{CH}_2$ ), 2.22 (s, 3H, N-Me), 2.08 (m, 4H,  $\text{N}^+\text{CH}_2\text{CH}_2$ ), 2.08 (br t,  $J = 6.6$  Hz, 4H,  $\text{NCH}_2\text{CH}_2$ );  $\delta_{\text{C}}$  (75 Mhz; DMSO- $d_6$ ) 182.6, 182.1, 167.9, 167.6, 62.9, 54.1, 52.3; 41.7, 28.5 and 24.5;  $m/z$  HRMS-ES(+) 662.2892 ( $\text{M}^+ - \text{I}^-$ ,  $\text{C}_{27}\text{H}_{49}\text{N}_7\text{O}_4\text{I}$  requires 662.2891).

Synthesis of host 2

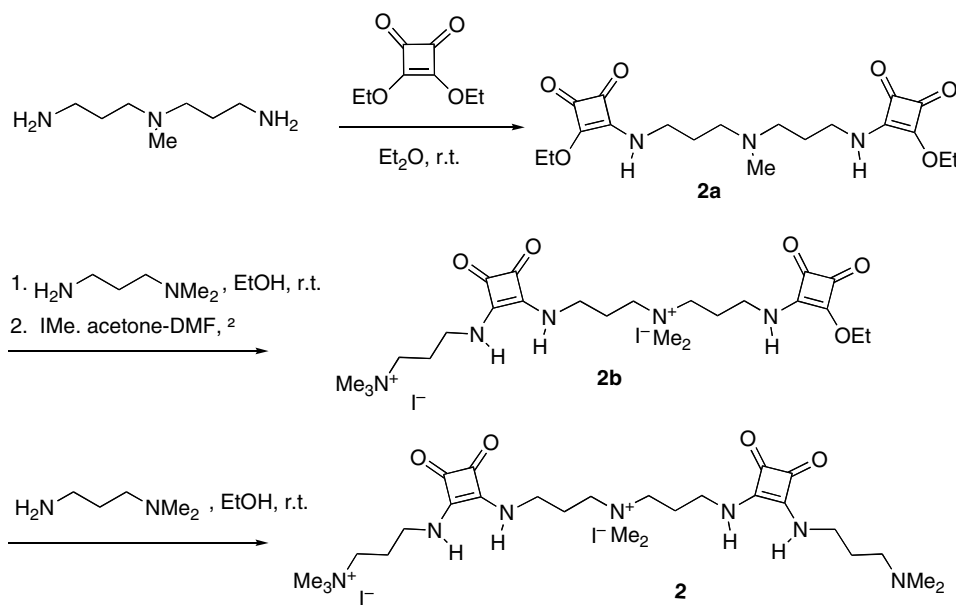

Preparation of N,N-bis-[3-(2-ethoxy-3,4-dioxo-1-cyclobutenyl)-aminopropyl]methylamine<sup>1</sup>

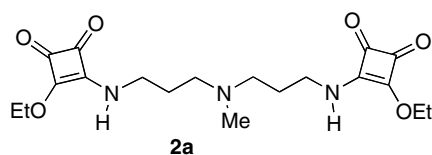

A solution of N,N-bis(3-aminopropyl)methylamine (464  $\mu\text{L}$ , 5.58 mmol) in ether (60 mL) was added dropwise to diethyl squarate (1.5 g, 8.8 mmol) in ether (5 mL) under Ar atmosphere. After the addition, the mixture was stirred at room temperature overnight. During this period, a yellow precipitated was formed. The reaction was diluted with *n*-pentane (20 mL), cooled at 0°C and the yellow solid was collected by centrifugation, washed with *n*-pentane-ether (9:1 v/v, 10 mL x 3) and dried under high vacuum for 24 h to provide the bis-squaramide ester as an amorphous yellow solid **2a** (878 mg, 74%).  $\nu_{\text{max}}$  (KBr)/ $\text{cm}^{-1}$ : 3448, 1801, 1653, 1600, 1540 and 1457;  $\delta_{\text{H}}$  (<sup>1</sup>H-RMN, DMSO-*d*<sub>6</sub>) 8.88 (br s, 0.6  $\times$  2H, NH<sub>syn</sub>), 8.67 (br s, 0.4  $\times$  2H, NH<sub>anti</sub>), 4.74 (q,  $J$  = 6.9 Hz, 4H), 3.60 (m, 0.4  $\times$  4H<sub>syn</sub>), 3.39 (m, 0.6  $\times$  4H<sub>anti</sub>), 2.39 (m, 4H), 2.20 (s, 3H), 1.73 (quintet,  $J$  = 6.9 Hz, 4H) and 1.45 (t,  $J$  = 7.0 Hz, 6H);  $\delta_{\text{C}}$  (75 MHz; CDCl<sub>3</sub>) 190.2, 183.5, 177.9, 173.1, 70.2, 56.2, 44.3, 42.0, 27.8 and 16.4;  $m/z$  HRMS-ES(+) 416.1778 (M + Na<sup>+</sup>). C<sub>19</sub>H<sub>27</sub>N<sub>3</sub>O<sub>6</sub>Na requires 416.1798).

Preparation of N-[3-(2-ethoxy-3,4-dioxo-1-cyclobutenyl)-aminopropyl]-N-[3-[2-(trimethylammoniumpropylamino)-3,4-dioxo-1-cyclobutenyl]aminopropyl]-N,N-dimethylammonium diiodide.

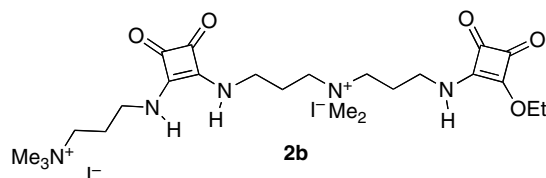

A solution of N,N-dimethylpropane-1,3-diamine (130 mg, 1.27 mmol) in ethanol (45 mL) was added dropwise over 24 h to a solution of the bis-monosquaramideester (1 g, 2.5 mmol) in ethanol (50 mL) under Ar atmosphere. After the addition, the reaction was stirred at room temperature for an additional period of 12h. After this time, EtOH was evaporated at vacuo. The residue was treated with acetonitrile (30 mL) and the resulting solid was collected by filtration. The crude solid was redissolved in THF (4 mL) and re-precipitated by addition of toluene (30 mL). After stirring for a short period, the mixture was set aside for 15 min., and then the solid was decanted. This process was repeated for three times. The resulting solid was redissolved in ethanol (20 mL) and evaporated again to dryness at vacuo. Finally, The solid was rinsed with ether (10 mL) and dried under reduced pressure to afford the mixed bis-squaramide ester as an amorphous yellow powder (60-80 %, depending on the rate of the initial addition).  $\delta_{\text{H}}$  (300

Mhz; CDCl<sub>3</sub>) 4.75 (m, 3H); 3.72 + 3.58 (two m, 6H); 2.55 + 2.48 (two m, 6H), 2.37 (s, 6H), 2.24 (s, 3H), 1.82 (m, 6H), 1.47 (t, 3H).

Methyl iodide (1.94 g, 13.6 mmol) was added via syringe over 30 min to a stirred solution of the mixed squaramide ester (2.0 g, 4.45 mmol) in a minimum volume of anhydrous DMF (30 mL) and acetone (50 mL). The mixture was heated under reflux in an atmosphere of argon for 12 h. After cooling at room temperature, a yellow solid was collected by centrifugation followed by removal of the supernatant. The solid was purified by washing with ethanol (2 x 10 mL) and dried under reduced pressure to provide the title compound **2b** as an amorphous pale yellow solid (2.3 g, 71 %).  $\nu_{\max}$  (KBr)/cm<sup>-1</sup>: 3448; 1801; 1653; 1600; 1540 and 1457;  $\delta_{\text{H}}$  (300 Mhz; DMSO-d<sub>6</sub>) 8.89 (br s, NH), 8.72 (br s, NH), 7.62 (br s, NH), 4.65 (br q,  $J = 6.9$  Hz, 2H), 3.64 (m, 4H), 3.16 (s, 9H), 3.10 (br s, 6H), 1.95 (m, 6H), 1.36 (t,  $J = 6.9$  Hz, 3H);  $\delta_{\text{C}}$  (75 Mhz; DMSO-d<sub>6</sub>) 186.8, 185.5, 182.5, 174.9, 167.8, 68.9, 62.8, 60.7, 60.4, 50.4, 50.1, 40.3, 24.1, 23.7 and 15.6;  $m/z$  HRMS-ES (+) 607.0336 ( $M^+ - \Gamma$ , C<sub>24</sub>H<sub>41</sub>N<sub>5</sub>O<sub>5</sub>I requires 607.0319).

**Preparation of N-[2-(3-dimethylamino-1-propylamino)-3,4-dioxo-1-cyclobutenyl]-3-aminopropyl]-N-[(2-(3-trimethylammonio-1-propylamino)-3,4-dioxo-1-cyclobutenyl)-3-aminopropyl]-N,N-dimethylammonium diiodide. (**2**)**

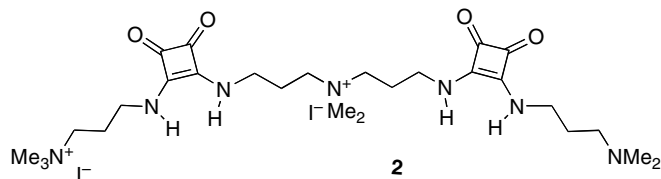

A solution of N,N-dimethylpropylendiamine (418 mg, 4.09 mmol) in methanol (20 mL) was added dropwise over 1 h to a stirred solution of **2b** (2.3 g, 3.13 mmol) in methanol (200 mL). The mixture was stirred overnight at room temperature in an atmosphere of argon. After this time, the solvent was removed at vacuo. The resulting yellow solid was purified by washing with acetone (3 x 20 mL) and finally dried under reduced pressure to afford **2** (2.1 g, 85%).  $\nu_{\max}$  (KBr)/cm<sup>-1</sup>: 3452, 1799, 1646, 1583, 1457 and 1361;  $\delta_{\text{H}}$  (300 Mhz; DMSO-d<sub>6</sub>) 7.51 (br s, NH), 3.7-3.4 (m, 8H, NH-CH<sub>2</sub>), 3.17 (s, 9H, Me<sub>3</sub>N<sup>+</sup>), 3.12 (s, 6H, Me<sub>2</sub>N<sup>+</sup>), 2.47 (br t,  $J = 6.9$  Hz, 2H, N-CH<sub>2</sub>), 2.25 (s, 6H, NMe), 2.07 (m, 6H, N<sup>+</sup>CH<sub>2</sub>CH<sub>2</sub>), 1.77 (br t,  $J = 7.2$  Hz, 4H, NCH<sub>2</sub>CH<sub>2</sub>);  $\delta_{\text{C}}$  (75 Mhz; DMSO-d<sub>6</sub>) 182.5, 182.3, 167.5 (br), 64.5, 60.7, 55.8, 52.4, 50.1, 44.9; 41.6; 40.5; 28.5; 24.1(br);  $m/z$  HRMS-ES(+) 662.2920 ( $M^+ - \Gamma$ , C<sub>27</sub>H<sub>49</sub>N<sub>7</sub>O<sub>4</sub>I requires 662.2891).

**Determination of association constants by isothermal titration calorimetry**

In a typical titration, 20-45 injections (5-10  $\mu$ l per injection) of a buffered solution of **1** or **2** ( $4.5 \times 10^{-3}$  M) in 96 % ethanol-water (9:1 v/v),<sup>3</sup> TRIS buffer ( $10^{-2}$  M), were injected into the sample cell containing 1.3 ml of a solution of (TMA)<sub>2</sub>SO<sub>4</sub> or ErB ( $5 \times 10^{-4}$  M) containing also TRIS buffer ( $10^{-2}$  M) in the same solvent mixture. In all cases “ $c$ ” parameter was > 40. The heats of dilution of the component in the syringe were subtracted prior to data analysis. The titration data were analyzed by curve-fitting software implemented (ORIGIN), which gave a number of sites ( $n$ ), apparent binding affinity ( $K$ ), and the standard enthalpy change ( $\Delta H^\circ$ ). The standard deviation based on the scatter of the data points in a single titration was also calculated.

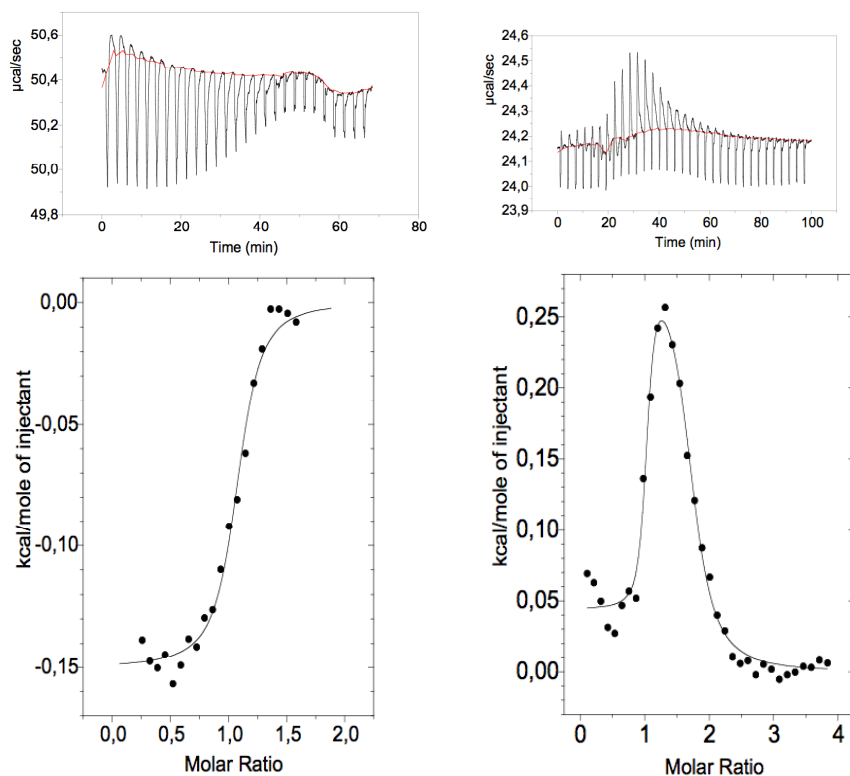

**Fig. S1.** ITC data of **1** ( $1.0 \times 10^{-3}$  M) vs  $(\text{TMA})_2\text{SO}_4$  ( $8.5 \times 10^{-3}$  M) (left side), of  $(\text{TMA})_2\text{SO}_4$  ( $5.0 \times 10^{-4}$  M) vs **2** ( $7.5 \times 10^{-3}$  M) (right side), data in 96%EtOH-H<sub>2</sub>O (TRIS buffer,  $10^{-2}$  M) at 293 K. See Table 1 for the corresponding thermodynamic parameters.

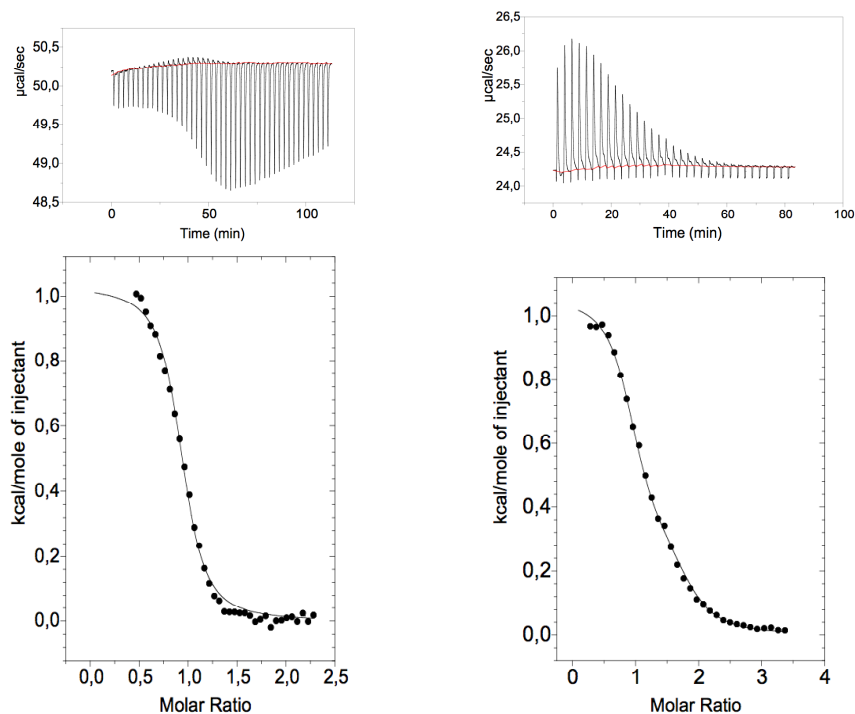

**Fig. S2.** ITC data of **1** ( $1.0 \times 10^{-3}$  M) vs Erythrosin B ( $8.5 \times 10^{-3}$  M) (left side), of Erythrosin B ( $5.0 \times 10^{-4}$  M) vs **2** ( $7.5 \times 10^{-3}$  M) (right side), data in 96%EtOH-H<sub>2</sub>O (TRIS buffer,  $10^{-2}$  M) at 293 K. See Table 1 for the corresponding thermodynamic parameters.

Changes in the  $^1\text{H}$  NMR of **2** upon addition of  $(\text{TMA})_2\text{SO}_4$  in  $\text{MeOH-d}_4$

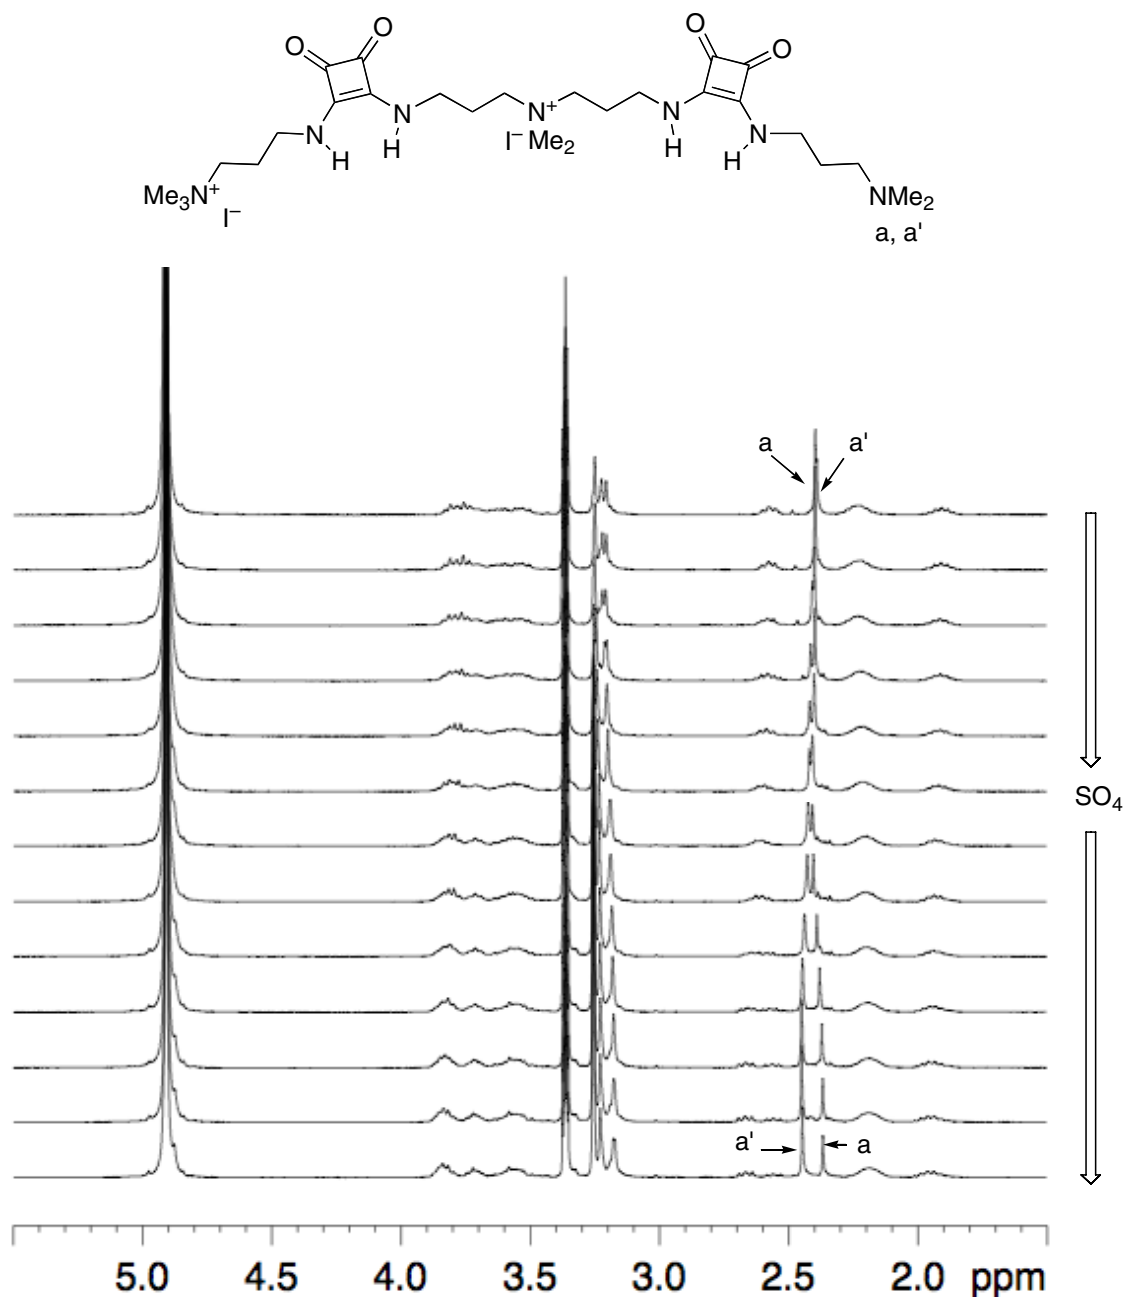

$[\mathbf{2}] = 4.86 \times 10^{-3}$  M in  $\text{MeOH-d}_4$

The graphical representation in **Fig. 2b** originated from a set of  $^1\text{H}$  NMR spectra such as those shown here for host **2**.

The tetramethyl ammonium groups resonance of hosts **1** and **2** initially set at 3.24 ppm move 0.02 ppm upfield upon titration with tetramethyl ammonium sulphate addition. This is consistent with the involvement of these groups with the anion-binding event as is expected. However, they are not easily fallen through the titration experiment. Broadening of the signals together with the close proximity of other resonances make these groups useless for fitting purposes.

**References:**

- 1 All mono-squaramide esters exist as a mixture of *syn/anti* rotamers that are clearly observed in the  $^1\text{H}$  NMR spectra. See, M. C. Rotger, M. Neus Piña, A. Frontera, G. Martorell, P. Ballester, P. M. Deyà, A. Costa, *J. Org. Chem.*, 2004, **69**, 2302.
- 2 ITC data were obtained in a mixture of 96 % ethanol: water (9:1 v/v) thus, the actual percentage of water in this mixture is around 14 %.

N,N-dimethylpropylendiamine
